# Supplementary material for: Oral Immunization of Rabbits with S. enterica Typhimurium Expressing Neisseria gonorrhoeae Filamentous Phage Φ6 Induces Bactericidal Antibodies Against N. gonorrhoeae
Source: PubMed Central journal article supplement (PMC4778046; doi:10.1038/srep22549), 2016-03-04

Oral Immunization of Rabbits with *S. enterica Typhimurium* Expressing *Neisseria gonorrhoeae*  
Filamentous Phage  $\Phi$ 6 Induces Bactericidal Antibodies Against *N. gonorrhoeae*

Andrzej Piekarowicz<sup>1\*</sup>, Aneta Kłyż<sup>1</sup>, Michał Majchrzak<sup>1</sup>, and Daniel C. Stein<sup>2\*</sup>

<sup>1</sup>Department of Virology, Institute of Microbiology, Faculty of Biology, University of Warsaw, Warsaw,

<sup>2</sup>University of Maryland

Department of Cell Biology and Molecular Genetics

College Park, MD 20742

Supplemental TABLE 1

## Primers used in this study

| Primer                        | Sequence (5' → 3')                                                          | Use                                           |
|-------------------------------|-----------------------------------------------------------------------------|-----------------------------------------------|
| ORF9F<br>ORF9R                | AAC TTTCGACGTGTCCGGGA ACTTATGGAGACGGA<br>AAGGCGCGGTGCTGATTGTTGGCGAAGCGCACTA | Cloning of ORF9 of NgoΦ6 into pET28a          |
| PhageΦ9R<br>PhageΦ9F          | TTATTGATTCAATCGGTGTCTTTCC<br>TTACGCCGATTTGTAACGCGATGGA                      | Detection of the presence of phage NgoΦ9      |
| PhageΦ8R<br>PhageΦ8F          | ATGGGCTTAAAGTGTCTGCCGAAA<br>TTACGCCGATTTGTAACGCGATGGA                       | Detection of the presence of phage NgoΦ8      |
| PhageΦ7R<br>PhageΦ7F          | ATGATGACGATTTTCATACGCGCGGC<br>TTACGCCGATTTGTAACGCGATGGA                     | Detection of the presence of phage NgoΦ7      |
| PhageΦ6R<br>PhageΦ6F          | TTTCATTTCCGGATTCCCACTTTTCG<br>ATGCGTAACGCCGTAGGATTGGATA                     | Detection of the presence of phage NgoΦ6      |
| Φ6LF<br>Φ6LR                  | TCCGAACCTTTGAAGCAA<br>CACTAAGCTTGGGATTACCCTTTTATATGCGGATAT                  | Amplification of the left flank of NgoΦ6      |
| Φ6RF<br>Φ6RR                  | CACTCTGCAGCAGCGTTGCGAGGCTTAAGC<br>GCCGGCCGCCCGGACT                          | Amplification of the right flank of NgoΦ6     |
| Φ7LF<br>Φ7LR                  | GTCCTCGCCTCGCTCG<br>GTGAAGCTTTTGCCGGTGTATTGGTAGG                            | Amplification of the left flank of NgoΦ7      |
| Φ7RF<br>Φ7RR                  | CACTCTGCAGAAATCGGTAAATTTGCGT<br>AGGGTTGGGCGGGACCCATTTCCCTTCTC               | Amplification of the right flank of NgoΦ7     |
| Φ8LF<br>Φ8LR                  | GACCCATTTCCCTTCCCTC<br>GTGAAGCTTTCCCGAAAGGAAAAAAGG                          | Amplification of the left flank of NgoΦ8      |
| Φ8RF<br>Φ8RR                  | CTCACTGCAGTATATCGATCCATCC<br>GATGATGACGATTTTCATAC                           | Amplification of the right flank of NgoΦ8     |
| Φ9LF<br>Φ9LR                  | TATTAACACATAAAAAACAAAGGA<br>GTGAAGCTTCGATAAATCCCGAAAGG                      | Amplification of the left flank of NgoΦ9      |
| Φ9RF<br>Φ9RR                  | CTCACTGCAATAAAATTCACAAAAATT<br>GTTCCGGCGGTGTTCCGCCG                         | Amplification of the right flank of NgoΦ9     |
| Omega-PstFR<br>Omega-HindIIIF | CAGTCTGCAGGAGTTAAGCCGCGCCGCGAA<br>GACCTCGAGTTGCAAACCGAAGCTTGTG              | Amplification of the spectinomycin cassette   |
| 0F16NheI<br>9FQER             | CTAGCTAGCATTTATCTGTTTACGGGAACAT<br>GCAAGCTTTTAGGACTTTCCGCCCATTC             | Cloning of Orf9 into pET21A                   |
| ChlorF<br>ChlorR              | ATCGTTTAAACGTTGATCGGCACGTAAGAG<br>ATCGTTTAAATAGCACAGGCGTTTAAGGG             | Amplification of the chloramphenicol cassette |
| KanF<br>KanR                  | CACTAAGCTTTATCTGGACAAGGAAAACGC<br>CACTCTGCAGGGTGAATCGAAATCTCGTGA            | Amplification of the Kanamycin cassette       |

**Fig.S1. Schematic of method used to delete NgoΦ6, NgoΦ7, NgoΦ8 and NgoΦ9 from**

**FA1090.** (A) Locations of the filamentous phage sequences on the FA1090 genome as determined by (28). (B) General scheme for removing phage sequences. Two amplicons (L-left and R-right) flanking each phage sequences were obtained by PCR and after digestion with HindIII (left flank DNA) and PstI (right flank DNA) ligated with the donor of antibiotic resistance cassette to produce a fragment (C). The ligation product containing antibiotic cassette integrated into left and right flanks of phages DNA was amplified by PCR using appropriate primers. Panel D indicates that the integration of the amplified DNA after *N. gonorrhoeae* transformation and selection of antibiotic resistant transformant (Panel E).

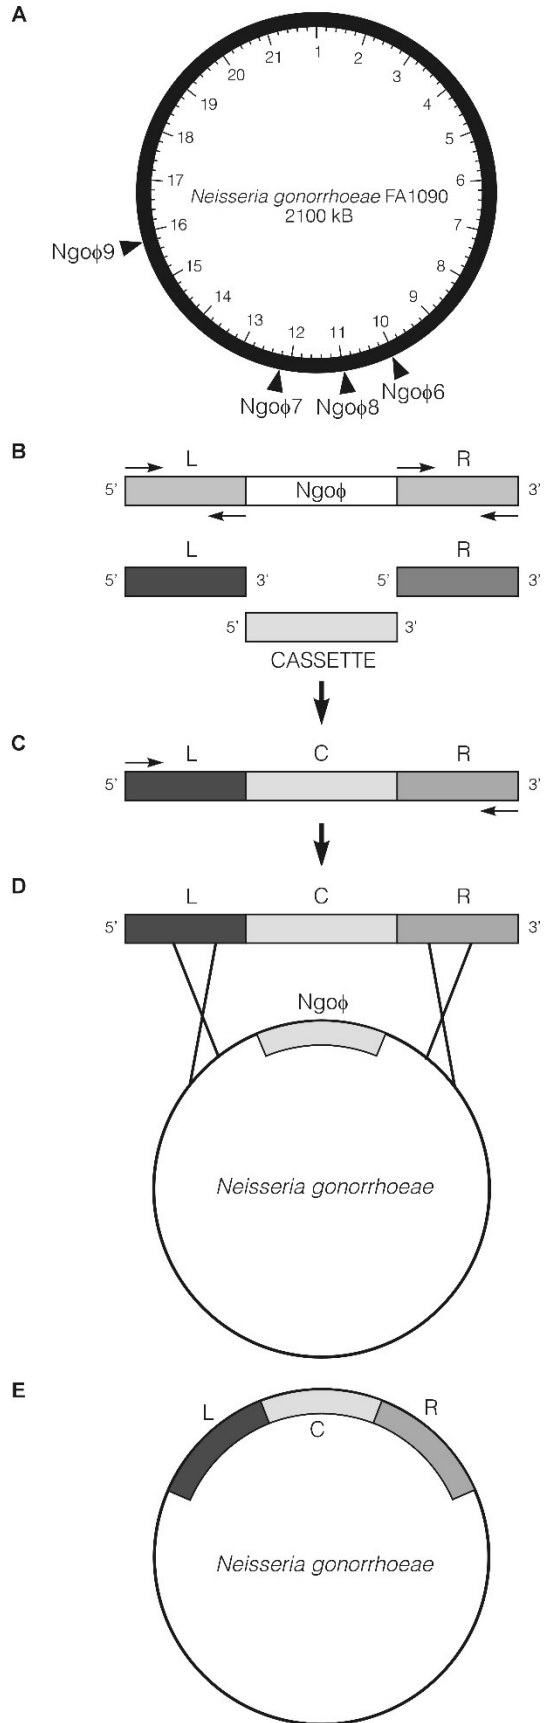

Construction of Figure 1:  
Lanes M and 1

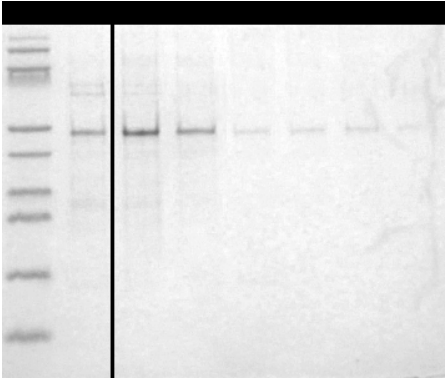

Lane 2

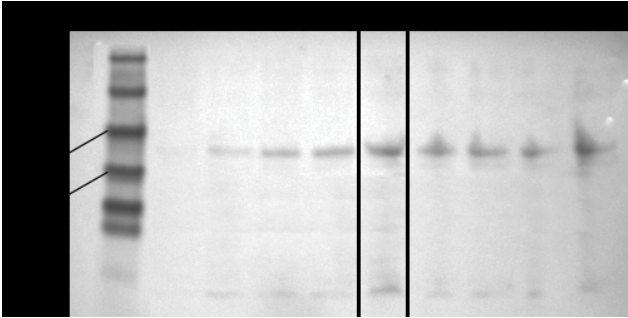

Lane 3, 4 and 5

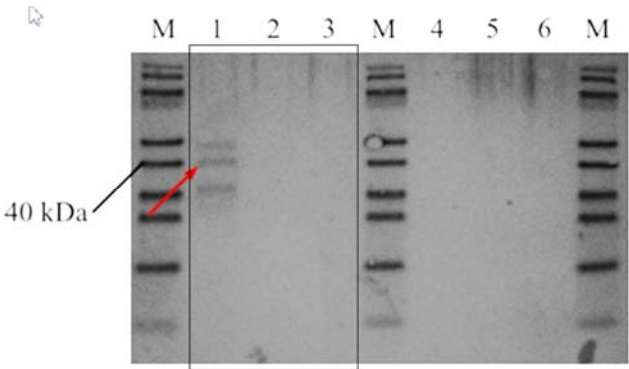

Final image:

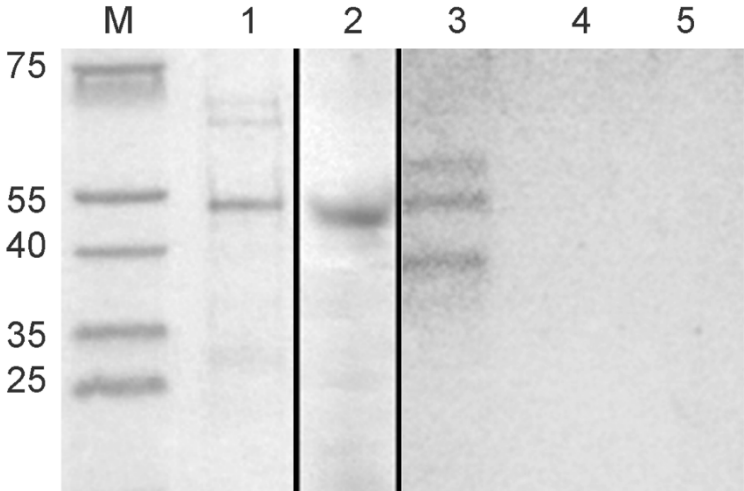

Supplement: srep22549-s1.pdf [file srep22549-s1.pdf]
